# Supplementary material
Source: Springer Nature journal article supplement (https://www.springermedizin.de/resource/supplementary/12950_2005_26_MOESM4_ESM.pdf/9557814)

C

LPS

0,1 1,0 10 100 Yuccaol C [ $\mu$ M]

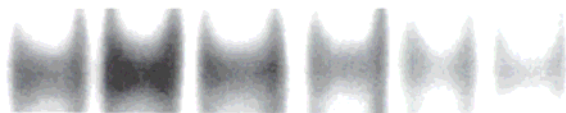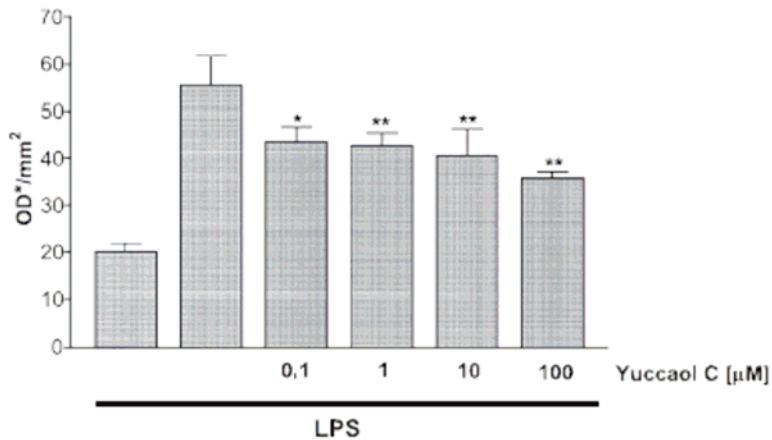

Supplement: MOESM4 [file 9557814]
